# Supplementary material for: The OsSPK1–OsRac1–RAI1 defense signaling pathway is shared by two distantly related NLR proteins in rice blast resistance
Source: PubMed Central journal article supplement — Plant Physiol. 2021 Sep 28;187(4):2852–64. doi: 10.1093/plphys/kiab445 (PMC8644225; doi:10.1093/plphys/kiab445), 2021-09-28
Supplement: kiab445_supplementary_data.pdf [file kiab445_supplementary_data.pdf]

The OsSPK1–OsRac1–RAI1 defense signaling pathway is shared by two distantly related NLR proteins in rice blast resistance

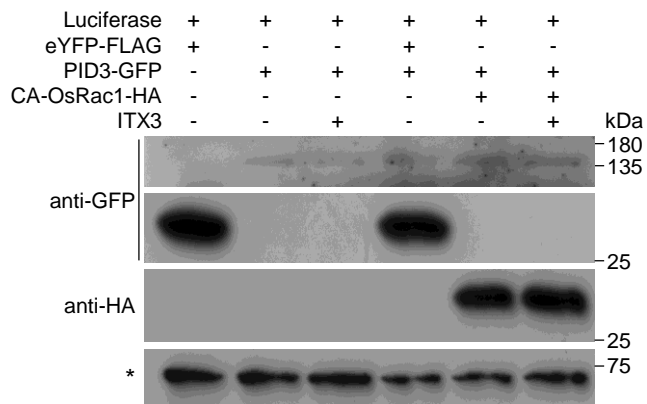

**Supplemental Figure S1.** Detection of the expressed proteins in Fig. 2A. Non-specific hybridized bands (\*), ~ 70 kilo-Dalton (kDa) in size, were used as equal-loading controls.

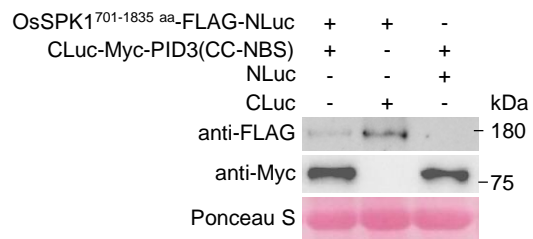

**Supplemental Figure S2.** Detection of the expressed proteins in Fig. 2C. The levels of Rubisco are shown as equal loading controls.

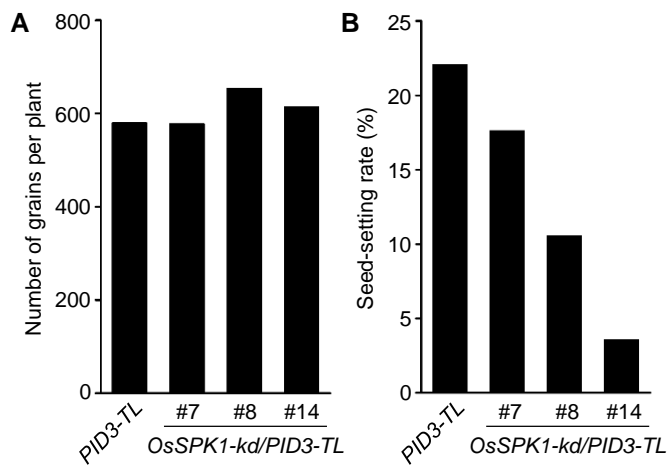

**Supplemental Figure S3.** Comparison of grain numbers and seed-setting rate between *PID3-TL* and *OsSPK1-kd/PID3-TL* plants ( $T_0$  generation).



cgctgccgaagaaatcacttctctgctcctcctatccccatccacaggattccagctattcgacaaccccctctctctttcttatctcttgcttttttcctt  
actgtcactctcttctctctctctgtcttctctctagtcattccttggcaaagttctttttcctccagcccaacATGCAGTTCTCTCAGATCC  
TCACCGTCTTGTTCCCTTGCGTCTCCGTCAGCGCCCTCCCGCCGGCGGTCTGCCCGGCAGCCCTG  
GCAGCGCTGTCCAGAGGTGCCACTGCCCCCTCGTGGCTCCCACGCCACGGCTCCCTCGCCGCT  
CGGGAGGAAGCGCCCGAGGCCGAAGGTGACGCCAAGATTTCCGCCGCTACACCTGCCCAACTG  
CCACAAGACGGGCAAAGGCTGCGATGATGGgtaaataagcaacccccatcccctgaaatccttttgcggtcatgttgctga  
cgtctttgatagCTGGTGCCAAGTCGAAAAGACGCACTGGTAGaggaaaagtcaatcgagtaattatacaggttagtgcttga  
ctagtctcttctaataacaatccatagtatattactaagtagtaagcacattcgcccttaattaattctggtatcagtaatgcccagaaggggttgat  
gctggggctcaaaagtcgggccactgcattatgcataattg

**Supplemental Figure S5.** Sequence for the *AvrPi9* locus identified in the rice blast isolate RB-22.

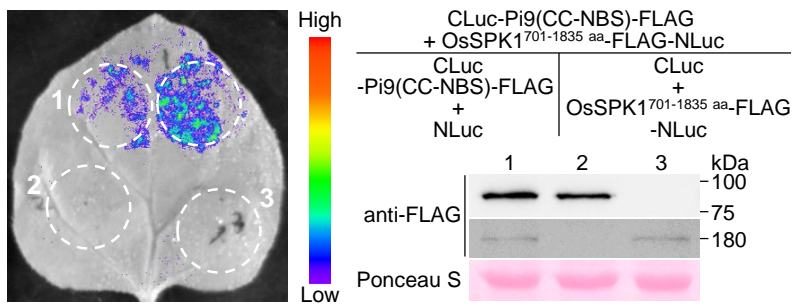

**Supplemental Figure S6.** Pi9 interacts with OsSPK1 as detected by LUC assay. *N. benthamiana* leaves were co-infiltrated with *Agrobacterium*-containing construct combinations as indicated. The luminescence images were captured using a cooled CCD imaging apparatus. Immunoblotting on the right panel showed the levels of the expressed proteins. Ponceau S staining indicates equal sample loading.

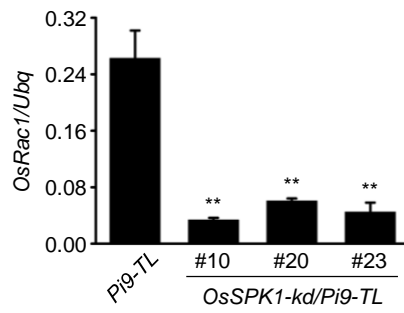

**Supplemental Figure S7.** *OsSPK1* knockdown affects *OsRac1* transcripts in rice plants. RT-qPCR data are shown as means  $\pm$  SD ( $n = 3$ ), and the difference significance was calculated from *Pi9-TL*. *Ubq*, UBIQUITIN. \*\*,  $P < 0.01$  (Student's *t*-test).



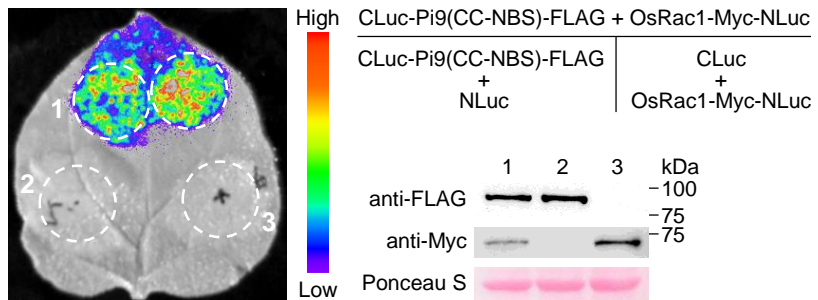

**Supplemental Figure S8.** Pi9 interacts with OsRac1 as detected by LUC assay. *N. benthamiana* leaves were co-infiltrated with *Agrobacterium*-containing construct combinations as indicated. The luminescence images were captured using a CCD imaging system. Immunoblotting on the right panel showed the levels of the expressed proteins. The levels of Rubisco are shown as equal loading controls.

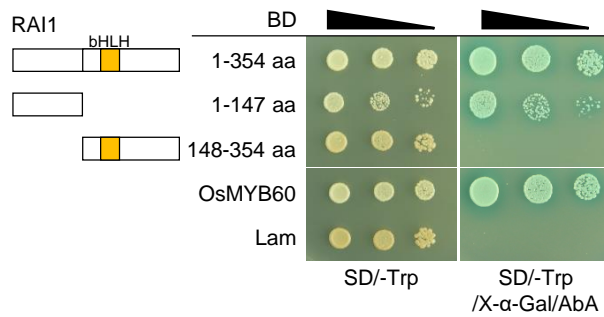

**Supplemental Figure S9.** Determination of RAI1 transactivation activity in yeast cells. In this experiment, the truncated regions of RAI1, or full-length RAI1, were each fused to the carboxyl end of the GAL4 DNA binding domain (BD). Yeast cultures transfected with OsMYB60 were used as positive controls while those with Lam as negative ones. Pictures taken at 5 d after the transformation.

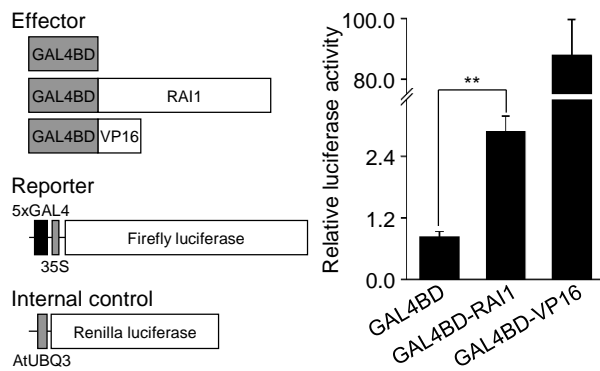

**Supplemental Figure S10.** Determination of RAI1 transactivation activity with a dual-luciferase reporter system. Schematic representation of each plasmid structure is shown (left panel). The plasmids of effector, reporter, and internal control were co-transfected into rice protoplasts for overnight incubation before detection. Cell cultures transfected with GAL4BD-VP16 were used as positive controls while those with GAL4BD as blank ones. Data are shown as mean  $\pm$  SD ( $n = 5$ ). \*\*,  $P < 0.01$  (Student's  $t$ -test).

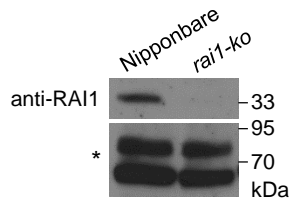

**Supplemental Figure S11.** Performance of anti-RAI1 in Western blotting analysis. The *rai1* knock-out mutant (*rai1-ko* for short) was created based on the Nipponbare background. Total protein was extracted and analyzed by immunoblotting. Non-specific bands (\*) confirmed equal loading.

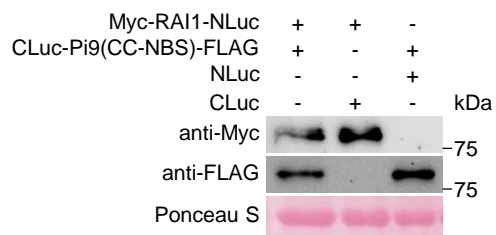

**Supplemental Figure S12.** Detection of the expressed proteins in Fig. 6D. Rubisco blots stained by Ponceau S are used as an equal loading control.

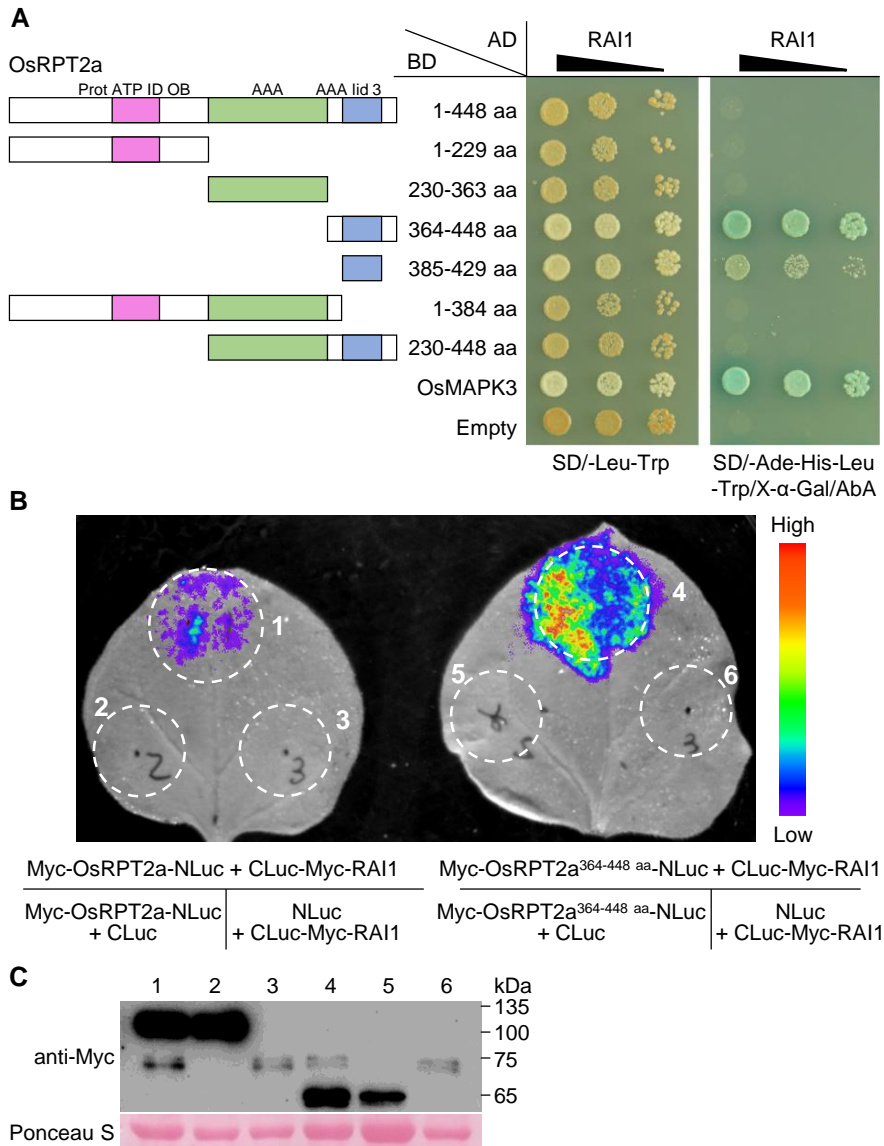

**Supplemental Figure S13.** OsRPT2a associates with RAI1. **A**, Yeast two-hybridization (Y2H) assay. The full-length RAI1 was fused to the carboxyl end of the GAL4 activation domain (AD). The indicated truncated regions of OsRPT2a and the full-length OsRPT2a were each fused to the carboxyl end of the BD. Yeast cultures co-transformed with BD-OsMAPK3 and AD-RAI1 were used as positive controls. Pictures taken at 5 d after the transformation. **B**, LUC assay. *N. benthamiana* leaves were co-infiltrated with *Agrobacterium*-containing construct combinations as indicated. The luminescence images were captured using a CCD imaging system. **C**, Levels of the expressed proteins shown in (B), as detected by immunoblotting. Ponceau S staining indicated equal loading.

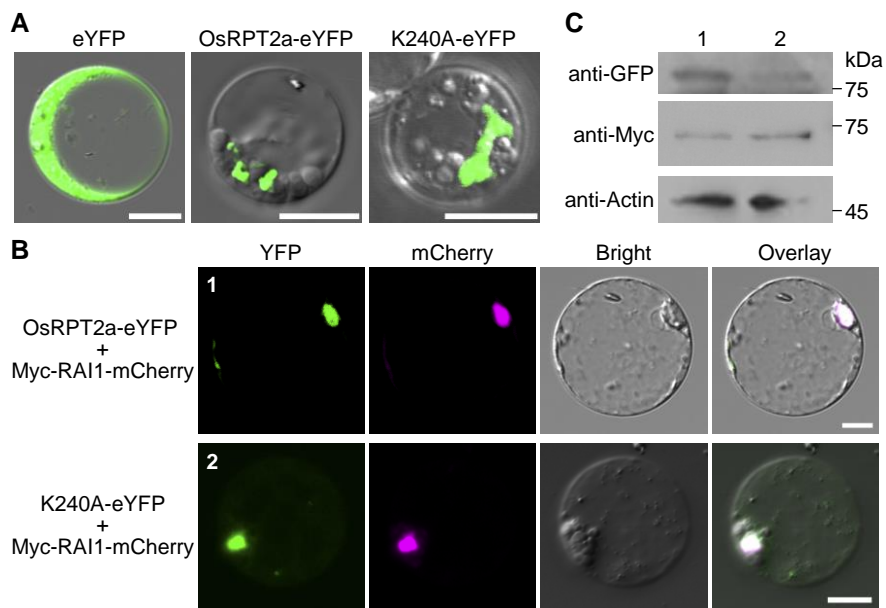

**Supplemental Figure S14.** OsRPT2a<sup>K240A</sup> has little effect on its subcellular distribution or co-localization with RAI1. A, Subcellular distribution eYFP fusions of OsRPT2a and OsRPT2a<sup>K240A</sup> (K240A). B, Co-localization of RAI1 and OsRPT2a or K240A in rice protoplasts. For A and B, fluorescent signals were captured with a confocal fluorescence microscope. Scale bars, 10  $\mu$ m. C, Detection of the expressed proteins shown in (B). Actin levels are shown as equal loading controls.

## Supplemental Table S1 Primers used in this study.

| Primers for RNA interference                               |                                                 |                                                  |
|------------------------------------------------------------|-------------------------------------------------|--------------------------------------------------|
| Gene name                                                  | Forward primer (5'-3')                          | Reverse primer (5'-3')                           |
| OsSPK1                                                     | GTAGAAGAGGTACCCGGGATGTGTTCCAGAGAGCCAA<br>GAGATG | GCATGCCCTGCAGGTCGACATGTGTTCCAGAGAGCCAAGAGAT<br>G |
| Primers for transient expression tests in rice protoplasts |                                                 |                                                  |
| Gene name                                                  | Forward primer (5'-3')                          | Reverse primer (5'-3')                           |
| PID3-GFP                                                   | AGAACACGGGGGACTCTAGAATGGCGGAGGGTGT<br>GTGGG     | CTTGCTCACCATGGATCCTTGAATCCTTTCTGCAGCCA           |
| OsRPT2a-FLAG/K240A-FLAG                                    | GAACACGGGGGACGAGCTATGGGGCAGGGCACCC<br>GGG       | TAGTCTTGAAGTTCGAGGACATGTAAAGACCTCCGG             |
| eYFP-FLAG                                                  | GAACACGGGGGACGAGCTATGGTGTGAGCAAGGGCGA<br>G      | TAGTCTTGAAGTTCGAGGCACTTGTACAGCTCGTCCAT           |
| Primers for BiFC                                           |                                                 |                                                  |
| Gene name                                                  | Forward primer (5'-3')                          | Reverse primer (5'-3')                           |
| Yn-Pi9(CC)                                                 | GAGCTCAAGCTTGAATTCATGGCGGAGACGGTGTG<br>CTG      | CTCTAGATCAGGTGGATCCTCAAAACAACACAGATTACCT         |
| Yc-RAI1                                                    | GAGCTCAAGCTTGAATTCATGGAGCTTGACGAGGAG<br>TC      | CTCTAGATCAGGTGGATCCTCAGACACCTTCCGCCAT            |
| Primers for subcellular localization                       |                                                 |                                                  |
| Gene name                                                  | Forward primer (5'-3')                          | Reverse primer (5'-3')                           |
| OsRPT2a-eYFP/K240A-eYFP                                    | AGCTCAAGCTTGAATTCATGGGGCAGGGCACCCCG<br>GG       | TTGCTCACCATCAGGATCCACATGTAAAGACCTCCGGC           |
| Myc-RAI1-mCherry                                           | AGCTCAAGCTTGAATTCATGGAGCAAAAGCTCATT<br>CT       | TGCTCACCATCAGGATCCACAGACACCTTCCGCCATA            |
| Primers for RT-qPCR                                        |                                                 |                                                  |
| Gene name                                                  | Forward primer (5'-3')                          | Reverse primer (5'-3')                           |
| Ubq                                                        | AACCAGCTGAGGCCAAGA                              | ACGATTGATTTAACAGTCCATGA                          |
| OsLOX3                                                     | CCGTACCAGCTGATGAAGC                             | TTTTGGAGCGTTTTGTCTCA                             |
| OsPR5                                                      | CGCTGCCCGACGCTTAC                               | ACGACTTGGTAGTTGCTGTTC                            |
| OsRac1                                                     | GTGTTTCATCTGCTCTCTCC                            | AGGCCCTATCTCACGGAG                               |
| OsSPK1                                                     | GGATACTCAAGGAAGTGTGG                            | GGCCATGAATCCAGCAATG                              |
| OsWRKY45                                                   | CGGGTAAAACGATCGAAAGA                            | TTTCGAAAGCGGAAGAACAG                             |
| Primers for semi-quantitative RT-PCR                       |                                                 |                                                  |
| Gene name                                                  | Forward primer (5'-3')                          | Reverse primer (5'-3')                           |
| RAI1                                                       | CGGCGACAAGGCGCTGCTCCA                           | CTCCTGAACAATGTCTGCTTG                            |
| OsActin1                                                   | GAACTGGTATGGTCAAGGC                             | AGTCTCATGGATACCCGACG                             |



## Supplemental Table S1 (continued)

| Primers for genomic sequencing           |                                           |                                            |
|------------------------------------------|-------------------------------------------|--------------------------------------------|
| Gene name                                | Forward primer (5'-3')                    | Reverse primer (5'-3')                     |
| AvrPi9                                   | AGGCCGCCTTTCGCTGCCGA                      | TAACTTGGTCGCAATTATG                        |
| Primers for Co-IP                        |                                           |                                            |
| Gene name                                | Forward primer (5'-3')                    | Reverse primer (5'-3')                     |
| PID3(CC-NBS)-GFP                         | AGAACACGGGGGACTCTAGAATGGCGGAGGGTGTGTGGG   | CTTGCTCACCATGGATCCATGGTCTGCAAGTTGTGCAA     |
| OsSPK1 <sup>701-1835 aa</sup> -FLAG      | AGAACACGGGGGACTCTAGAATGTTTCGAGCTATGGTCAAT | CATATGGTCGACGGATCCTAGCTCTGAAAGAATTGCAG     |
| Primers for LUC assay                    |                                           |                                            |
| Gene name                                | Forward primer (5'-3')                    | Reverse primer (5'-3')                     |
| OsSPK1 <sup>701-1835 aa</sup> -FLAG-NLuc | GCTCGGTACCCGGGATCCATGTTTCGAGCTATGGTCAATA  | GTACGAGATCTGGTCGACCTTATCGTCATCGTCCTTGTA    |
| Myc-RAI1-NLuc                            | GACGAGCTCGGTACCCGGATGGAGGAGCAGAAGCTGAT    | CGTACGAGATCTGGTCGACCAGACACCTTCCGCCATAGC    |
| OsRac1-Myc-NLuc                          | GCTCGGTACCCGGGATCCATGGAGGAGCAGAAGCTGATC   | GTACGAGATCTGGTCGACCGCAAACAAGCGCTTCCGCA     |
| Myc-OsRPT2a-NLuc                         | GACGAGCTCGGTACCCGGATGGAGGAGCAGAAGCTGAT    | CGTACGAGATCTGGTCGACCATGTAAAGACCTCCGGC      |
| Myc-OsRPT2a <sup>364-448 aa</sup> -NLuc  | GACGAGCTCGGTACCCGGATGGAGGAGCAGAAGCTGAT    | CGTACGAGATCTGGTCGACCATGTAAAGACCTCCGGC      |
| CLuc-Myc-PID3(CC-NBS)                    | GGGCGGTACCCGGGATCCAGAGGAGCAGAAGCTGATC     | GAAAGCTCTGCAGGTCGACCTAATGGTCTGCAAGTTGTGCAA |
| CLuc-Pi9(CC-NBS)-FLAG                    | GGGCGGTACCCGGGATCCAATGGCGGAGACGGTGCTGAGC  | GAAAGCTCTGCAGGTCGACCTACTTATCGTCATCGTCCTT   |
| CLuc-Myc-RAI1                            | GGGCGGTACCCGGGATCCAGAGCAAAGCTCATTCTGAA    | AAAGCTCTGCAGGTCGACCTACAGACACCTTCCGCCATA    |
| Primers for yeast-related assays         |                                           |                                            |
| Gene name                                | Forward primer (5'-3')                    | Reverse primer (5'-3')                     |
| AD-OsSPK1 <sup>1002-1835 aa</sup>        | ATGGCCATGGAGGCCAGTGACGACATGACTCTGATCA     | GCTCGAGCTCGATGGATCTTATAGCTCTGAAAGAATTG     |
| AD-RAI1                                  | ATGGCCATGGAGGCCAGTATGGAGCTTGACGAGGAGTC    | GCTCGAGCTCGATGGATCCTACAGACACCTTCCGCCAT     |
| BD-PID3(CC)                              | CATATGGCCATGGAGGCCATGGCGGAGGGTGTGTGGG     | GCTGCAGGTCGACGGATCCTACCTCTTCCGCTGTGCG      |
| BD-PID3(NBS)                             | CATATGGCCATGGAGGCCAGCTCAAAGTGGAGATCTGA    | GCTGCAGGTCGACGGATCCTAATGGTCTGCAAGTTGTGCG   |
| BD-Pi9(CC)                               | CATATGGCCATGGAGGCCATGGCGGAGACGGTGCTG      | GCTGCAGGTCGACGGATCTCAAACAACACAGATTACCT     |

## Supplemental Table S1 (continued)

|                                            |                                            |                                          |
|--------------------------------------------|--------------------------------------------|------------------------------------------|
| BD-PI9(NBS)                                | CATATGGCCATGGAGGCCGGATGGGTGGTTTAGGC<br>AA  | GCTGCAGGTCGACGGATCTCAACAAACTGCATGTGCTAGA |
| BD-PI9(LRR)                                | CATATGGCCATGGAGGCCCTAGATCAATTGAGGATGTT     | GCTGCAGGTCGACGGATCTCATCCTTCGGCTTCAGCCCC  |
| BD-RAI1                                    | CATATGGCCATGGAGGCCATGGAGCTTGACGAGGAGT<br>C | GCTGCAGGTCGACGGATCTCAGACACCTTCGCCAT      |
| BD-RAI1 <sup>1-147 aa</sup>                | CATATGGCCATGGAGGCCATGGAGCTTGACGAGGAGT<br>C | GCTGCAGGTCGACGGATCTAGAACGTCGGCGACGACGA   |
| BD-RAI1 <sup>148-354 aa</sup>              | CATATGGCCATGGAGGCCATGTTTGAGGTGGCGCC        | GCTGCAGGTCGACGGATCTCAGACACCTTCGCCAT      |
| BD-OsRPT2a                                 | CATATGGCCATGGAGGCCATGGGGCAGGGCACCCCG<br>GG | GCTGCAGGTCGACGGATCTCATGTAAAGACCTCCG      |
| BD-OsRPT2a <sup>1-229 aa</sup>             | CATATGGCCATGGAGGCCATGGGGCAGGGCACCCCG<br>GG | GCTGCAGGTCGACGGATCTCATCCTTGGGTGGCTGAT    |
| BD-OsRPT2a <sup>230-363 aa</sup>           | CATATGGCCATGGAGGCCATGATATTATACGGAGAACC     | GCTGCAGGTCGACGGATCTCACAGAGGAAATTCTATCT   |
| BD-OsRPT2a <sup>364-448 aa</sup>           | CATATGGCCATGGAGGCCAGATATTAAACTAGGGC        | GCTGCAGGTCGACGGATCTCATGTAAAGACCTCCG      |
| BD-OsRPT2a <sup>385-429 aa</sup>           | CATATGGCCATGGAGGCCATGTGAACCTGGAAGAGT<br>T  | GCTGCAGGTCGACGGATCTCACTTCTGAAGTCAGCAT    |
| BD-OsRPT2a <sup>1-384 aa</sup>             | CATATGGCCATGGAGGCCATGGGGCAGGGCACCCCG<br>GG | GCTGCAGGTCGACGGATCTCAATCTGCCAATGTCATCT   |
| BD-OsRPT2a <sup>230-448 aa</sup>           | CATATGGCCATGGAGGCCATGATATTATACGGAGAACC     | GCTGCAGGTCGACGGATCTCACATGTAAAGACCTCCG    |
| Primers for dual luciferase reporter assay |                                            |                                          |
| Gene name                                  | Forward primer (5'-3')                     | Reverse primer (5'-3')                   |
| GAL4BD-RAI1                                | CCGTCTAGAACTAGTGAATGGAGCTTGACGAGGAGT<br>C  | TAAGCTTGATATCGAATTCTACAGACACCTTCGCCAT    |
| Primers for ATPase activity assays         |                                            |                                          |
| Gene name                                  | Forward primer (5'-3')                     | Reverse primer (5'-3')                   |
| OsRPT2a-GST/K240A-GST                      | GGTGGTGGTGAATTCCAATGGGGCAGGGCACCCCG<br>GG  | TCACGATGAATTAAGCTTCATGTAAAGACCTCCGGCA    |
